# Supplementary material
Source: bioRxiv or medRxiv preprint supplement (https://www.biorxiv.org/highwire/filestream/3595/field_highwire_adjunct_files/2/013946-3.pdf)

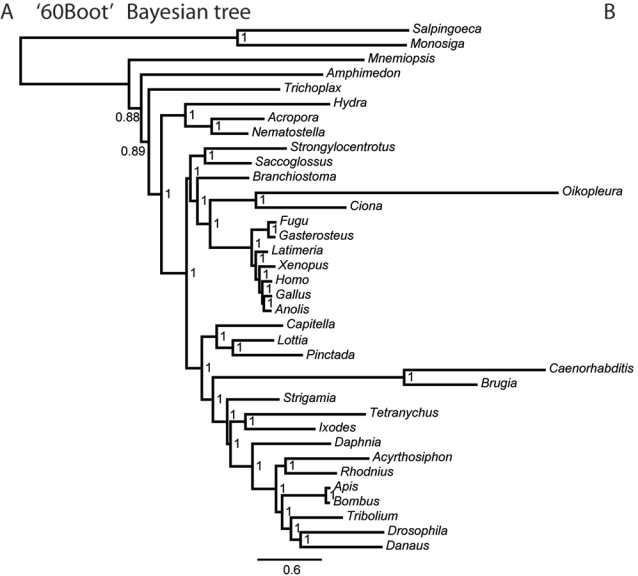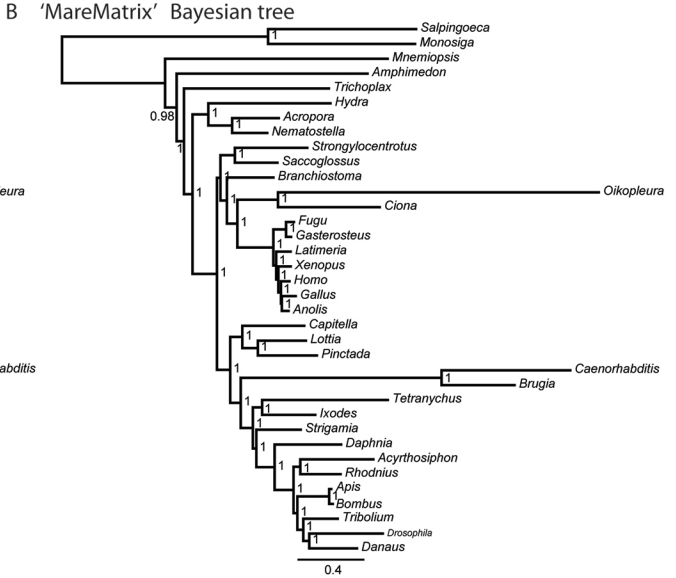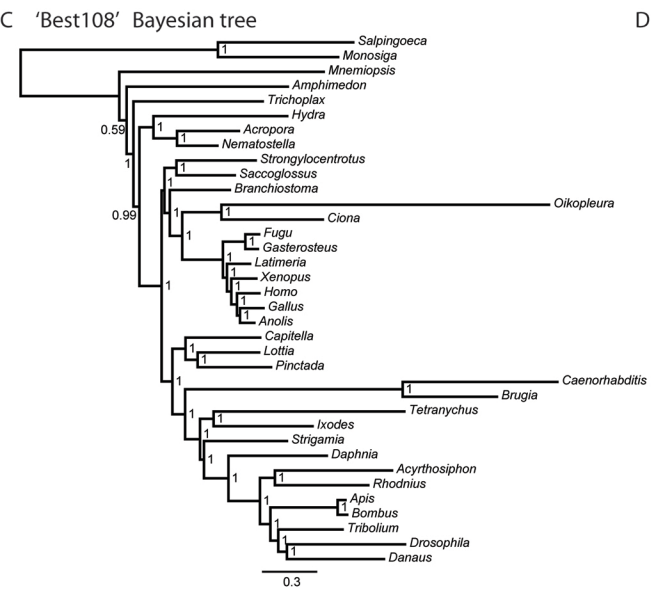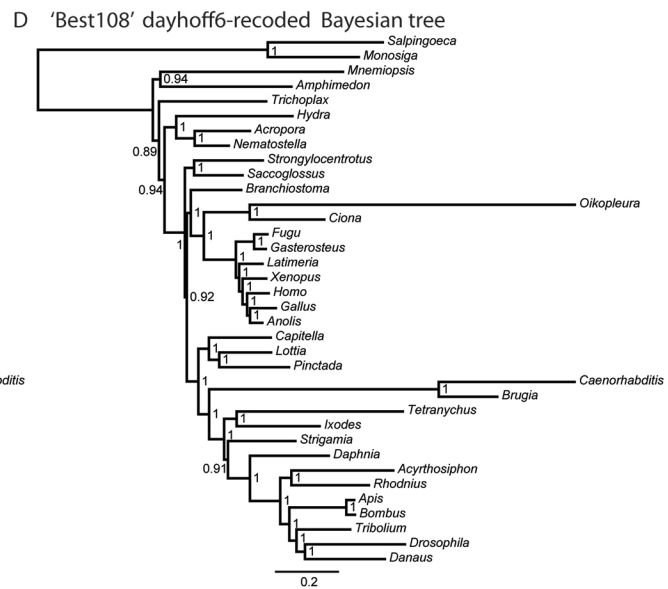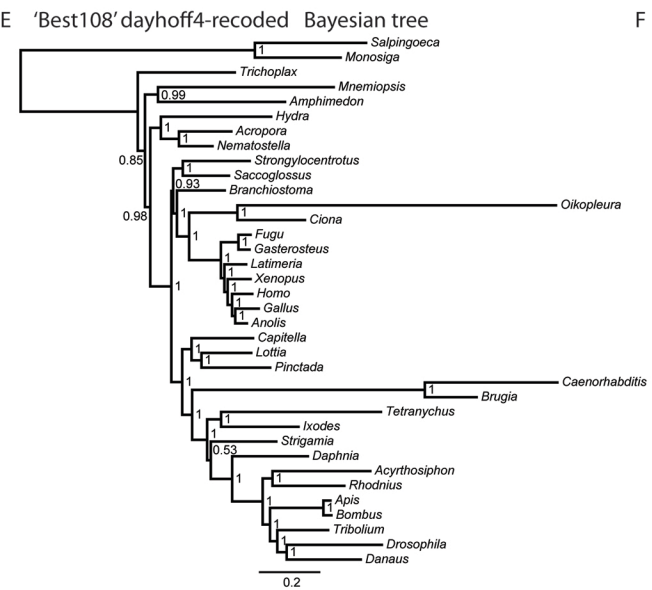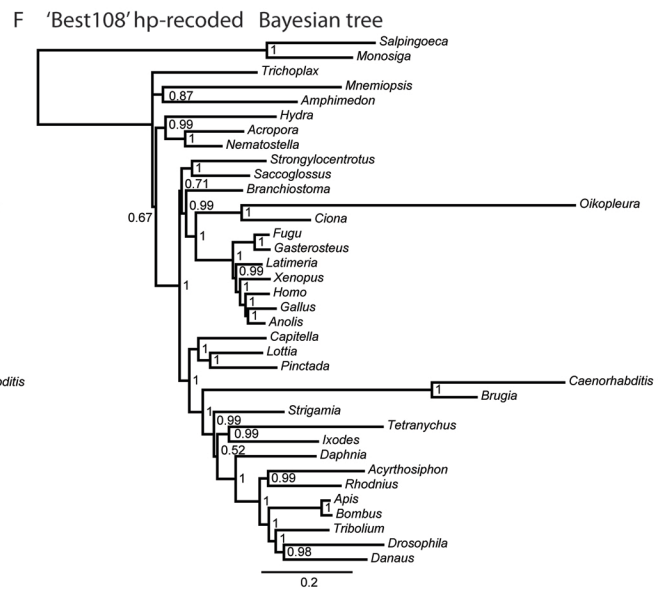

Supplement: Supplementary file [file 013946-3.pdf]
